# Supplementary material
Source: Springer Nature journal article supplement (https://www.springermedizin.de/resource/supplementary/12955_2013_1305_MOESM1_ESM.pdf/9559532)

**2923 patients**

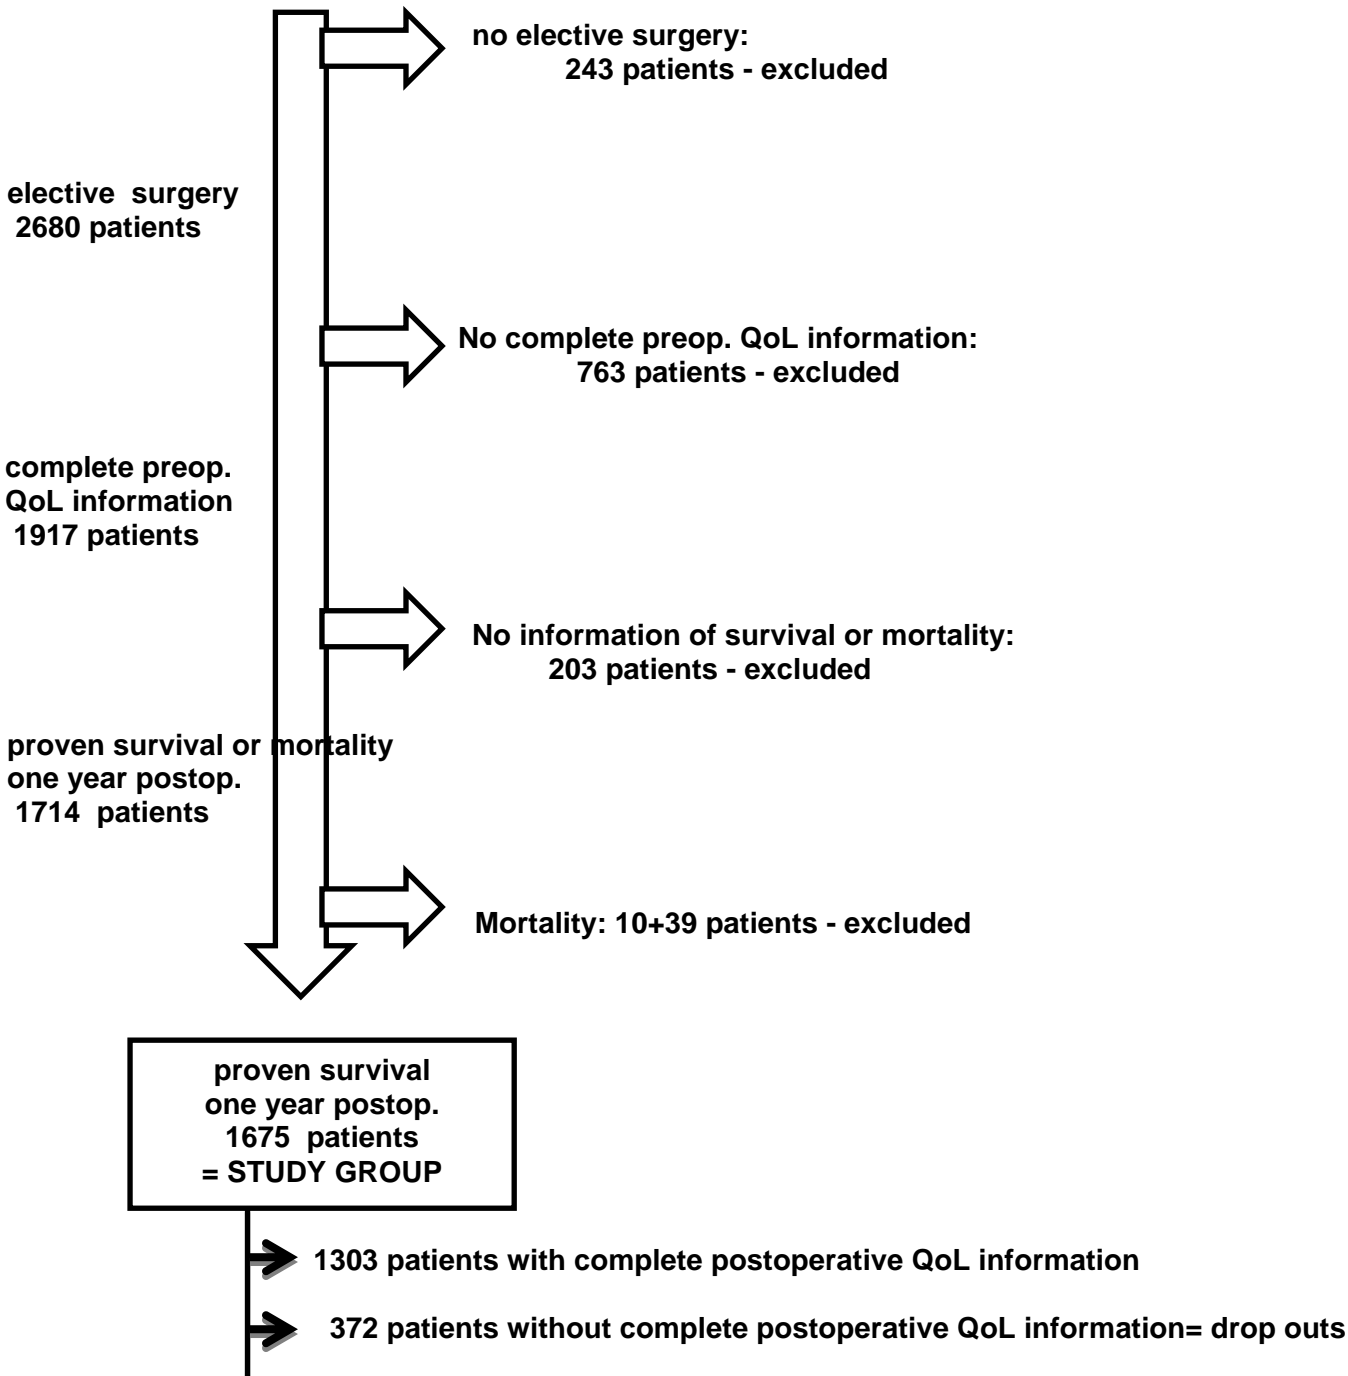

Supplement: MOESM1 [file 9559532]
